# Supplementary material for: Interstitial lung disease before and after COVID-19: a double threat?
Source: PubMed Central journal article supplement — Eur Respir J. 2021 Dec 2;58(6):2101956. doi: 10.1183/13993003.01956-2021 (PMC8637181; doi:10.1183/13993003.01956-2021), 2021-12-02

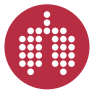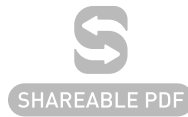

# Interstitial lung disease before and after COVID-19: a double threat?

Claudia Valenzuela<sup>1</sup>, Grant Waterer<sup>2</sup> and Ganesh Raghu<sup>3</sup>

<sup>1</sup>ILD Unit, Pulmonology Dept Hospital Universitario de la Princesa, University Autonoma de Madrid, Madrid, Spain. <sup>2</sup>University of Western Australia, Royal Perth Hospital, Perth, Australia. <sup>3</sup>Center for Interstitial Lung Diseases, University of Washington, Seattle, WA, USA.

Corresponding author: Ganesh Raghu ([graghu@uw.edu](mailto:graghu@uw.edu))

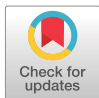

Shareable abstract (@ERSpublications)

**Pre-existing ILD and pulmonary fibrosis increases the risk to manifest severe COVID-19. Residual interstitial lung changes and sequelae have been observed in COVID-19 survivors. A closer and standardised long-term follow-up of these patients is needed.** <https://bit.ly/3jWBPCG>

**Cite this article as:** Valenzuela C, Waterer G, Raghu G. Interstitial lung disease before and after COVID-19: a double threat? *Eur Respir J* 2021; 58: 2101956 [DOI: 10.1183/13993003.01956-2021].

This single-page version can be shared freely online.

Copyright ©The authors 2021.

This version is distributed under the terms of the Creative Commons Attribution Non-Commercial Licence 4.0. For commercial reproduction rights and permissions contact [permissions@ersnet.org](mailto:permissions@ersnet.org)

Received: 13 July 2021

Accepted: 31 Aug 2021

Sadly, there have already been nearly 200 million confirmed cases of coronavirus disease 2019 (COVID-19) and more than 4 million deaths [1]. The true toll is certainly much higher. We have learned much about the wide spectrum of disease due to COVID-19 over the past 18 months, ranging from asymptomatic infection to severe pneumonia, respiratory failure and death [2]. There is growing concern about whether survivors of COVID-19 will have long-term pulmonary sequelae, including fibrotic interstitial lung disease (ILD) and/or manifest progressive pulmonary fibrosis [3].

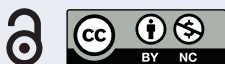

Supplement: ERJ-01956-2021.Shareable.pdf [file ERJ-01956-2021.Shareable.pdf]
